# Supplementary material for: Microneedle-based nanomotor cancer vaccine combined with chemotherapy for synergistic melanoma therapy
Source: Royal Society of Chemistry journal article supplement (doi:10.1039/d5nr01240f), 2025-01-01
Supplement: d5nr01240f1.pdf [file d5nr01240f1.pdf]

## **Supplementary data**

# **Microneedle-Based Nanomotor Cancer Vaccine Combined with Chemotherapy for Synergistic Melanoma Therapy**

Yu Chen, Nian Liu, Shufan Feng, Wenhui Xu, Chun Mao\*, Mimi Wan\*

National and Local Joint Engineering Research Center of Biomedical Functional Materials, School of Chemistry and Materials Science, Nanjing Normal University, Nanjing 210023, China

\* Corresponding author.

E-mail addresses: maochun@njnu.edu.cn (C. Mao), wanmimi@njnu.edu.cn (M. Wan).

## Supplementary figure

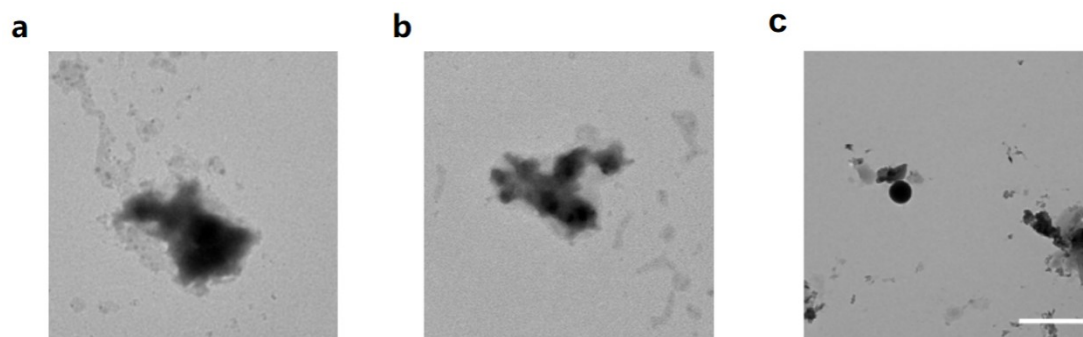

**Fig. S1** TEM images of OVA/BSA cancer vaccine (The ratio of OVA to BSA is (a) 0.5:1; (b) 1.5:1 and (c) 2:1, scale bar: 500 nm).

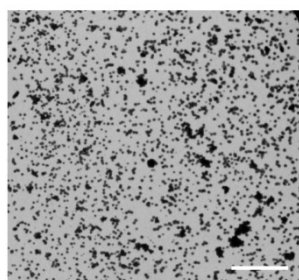

**Fig. S2** TEM image of OVA/BSA cancer vaccine (OVA to BSA ratio 1:1; scale bar: 5  $\mu\text{m}$ ).

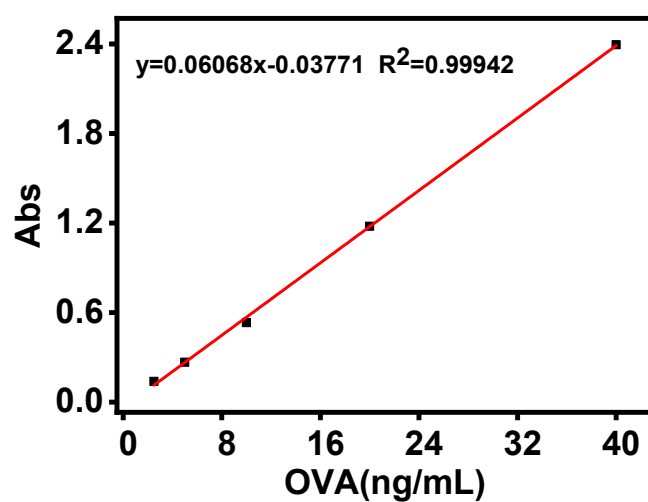

**Fig. S3** Standard curve of OVA concentration and absorbance.

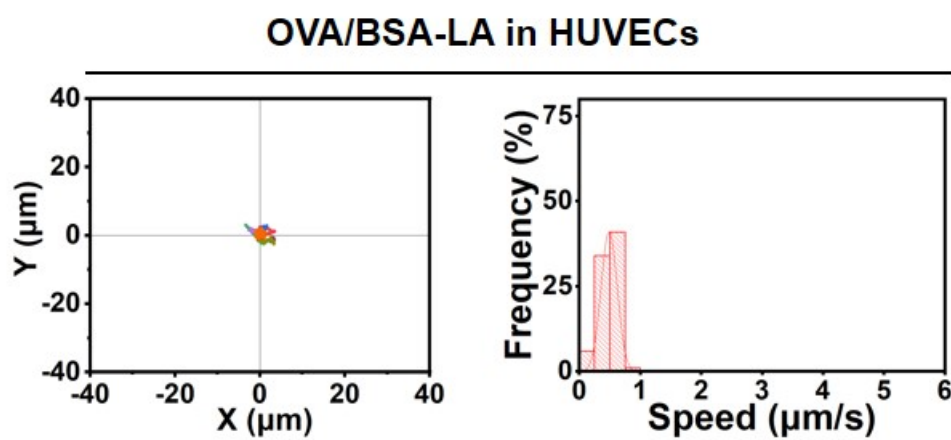

**Fig. S4** Trajectory and speed distribution of OVA/BSA-LA nanomotor cancer vaccine after incubation with HUVECs endothelial cells for 24 h.

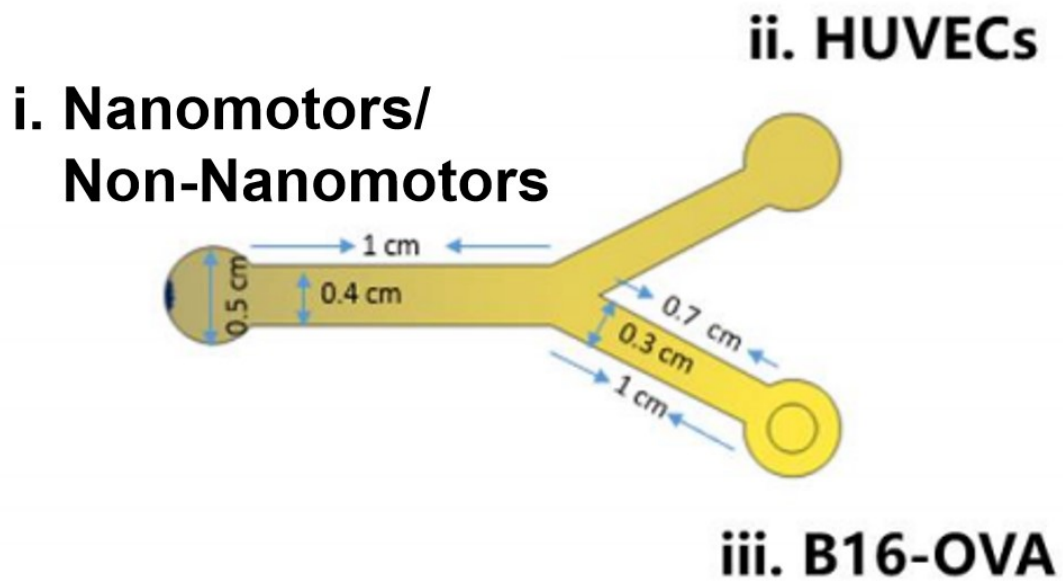

**Fig. S5** Schematic diagram of Y-shaped channel.

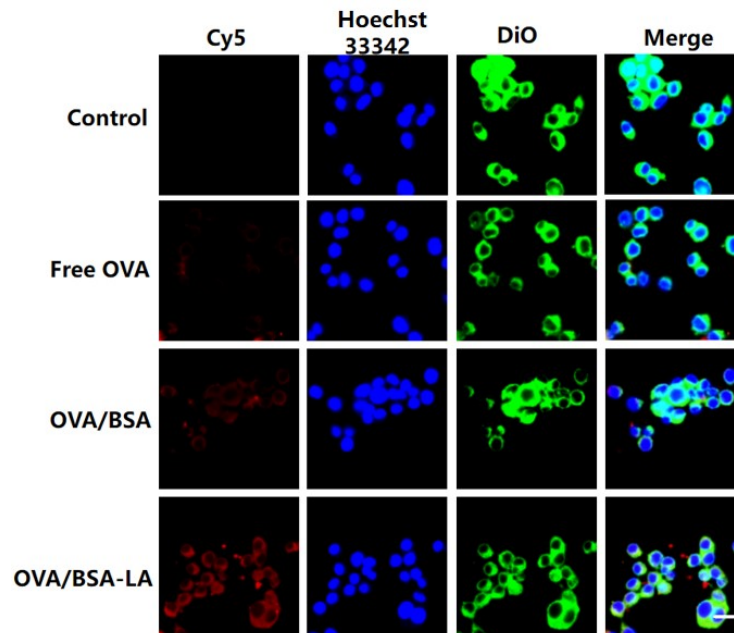

**Fig. S6** Fluorescence localization analysis of B16-OVA cells incubated with OVA/BSA and OVA/BSA-LA for 4 h (red: Cy5 labeled samples, blue: Hoechst 33342 labeled nucleus, green: Dio labeled cell membrane, scale bar: 50  $\mu$ m).

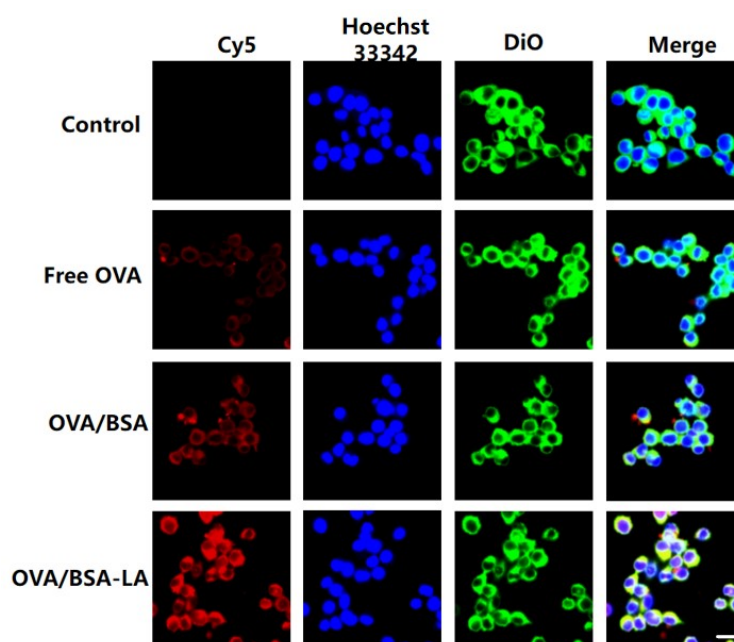

**Fig. S7** Fluorescence localization analysis of B16-OVA cells incubated with OVA/BSA cancer vaccine and OVA/BSA-LA nanomotor cancer vaccine for 12 h (red: Cy5 labeled samples, blue: Hoechst 33342 labeled nucleus, green: Dio labeled cell membrane, scale bar: 50  $\mu\text{m}$ ).

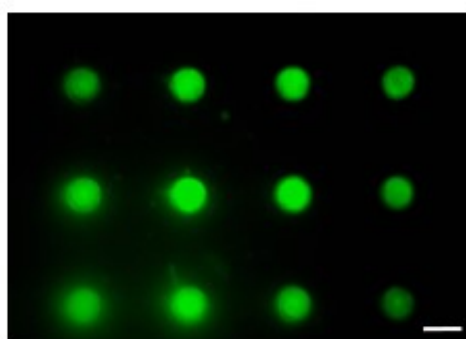

**Fig. S8** MN patch fluorescence images loaded with OVA/BSA-LA (green: Fitc labeled OVA/BSA-LA, scale bar: 200  $\mu\text{m}$ ).

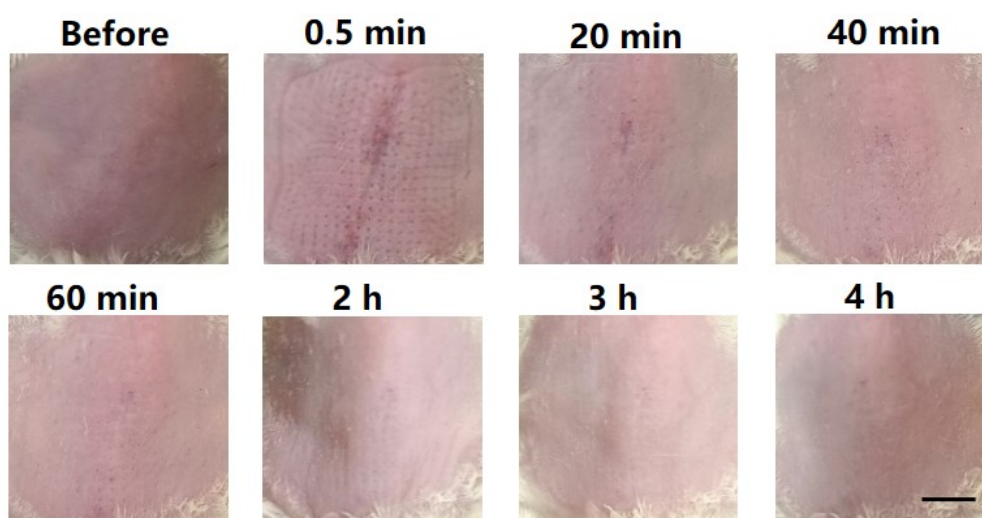

**Fig. S9** Observation of microchannels before and after microneedle insertion into the skin of Balb/c mice (scale bar: 5 mm).

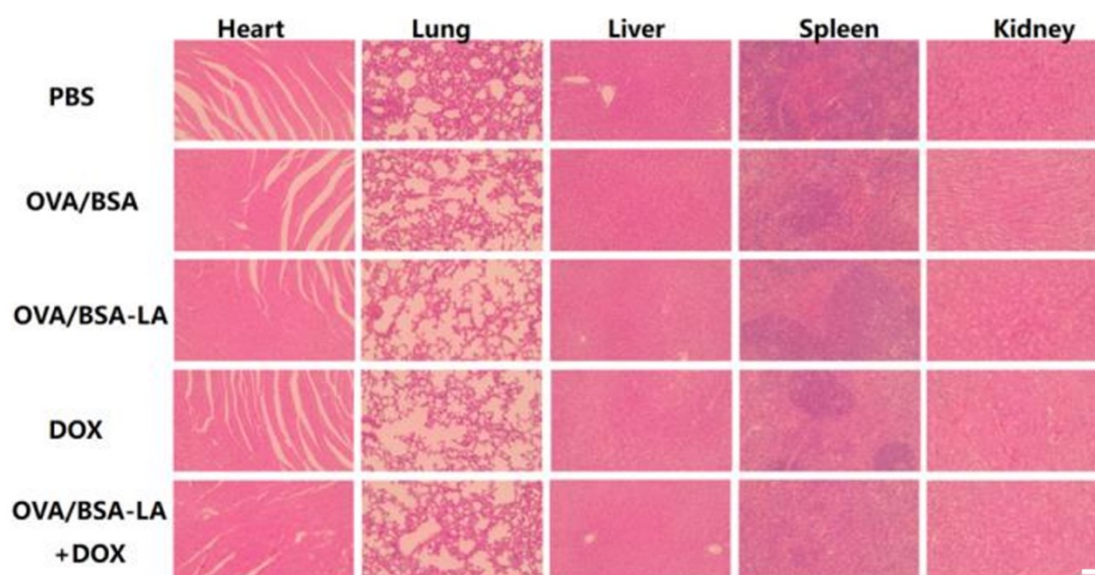

**Fig. S10** H&E staining images of major organs (heart, liver, spleen, lung, and kidney) from B16-OVA tumor-bearing mice after treatment with different samples (scale bar: 100  $\mu$ m).
